# Supplementary material for: Single domain growth and charge ordering of epitaxial YbFe2O4 films
Source: Royal Society of Chemistry journal article supplement (doi:10.1039/d1ce00834j), 2021-01-01
Supplement: d1ce00834j1.pdf [file d1ce00834j1.pdf]

## Supporting information

### Single domain growth and charge ordering of epitaxial YbFe<sub>2</sub>O<sub>4</sub> films

*Takumi SAKAGAMI,<sup>1</sup> Reika OTA,<sup>1</sup> Jun KANO,<sup>1</sup> Naoshi IKEDA<sup>2</sup>, and Tatsuo FUJII<sup>1,\*</sup>*

<sup>1</sup>Department of Applied Chemistry, Okayama University, Okayama 700-8530, Japan

<sup>2</sup>Department of Physics, Okayama University, Okayama 700-8530, Japan

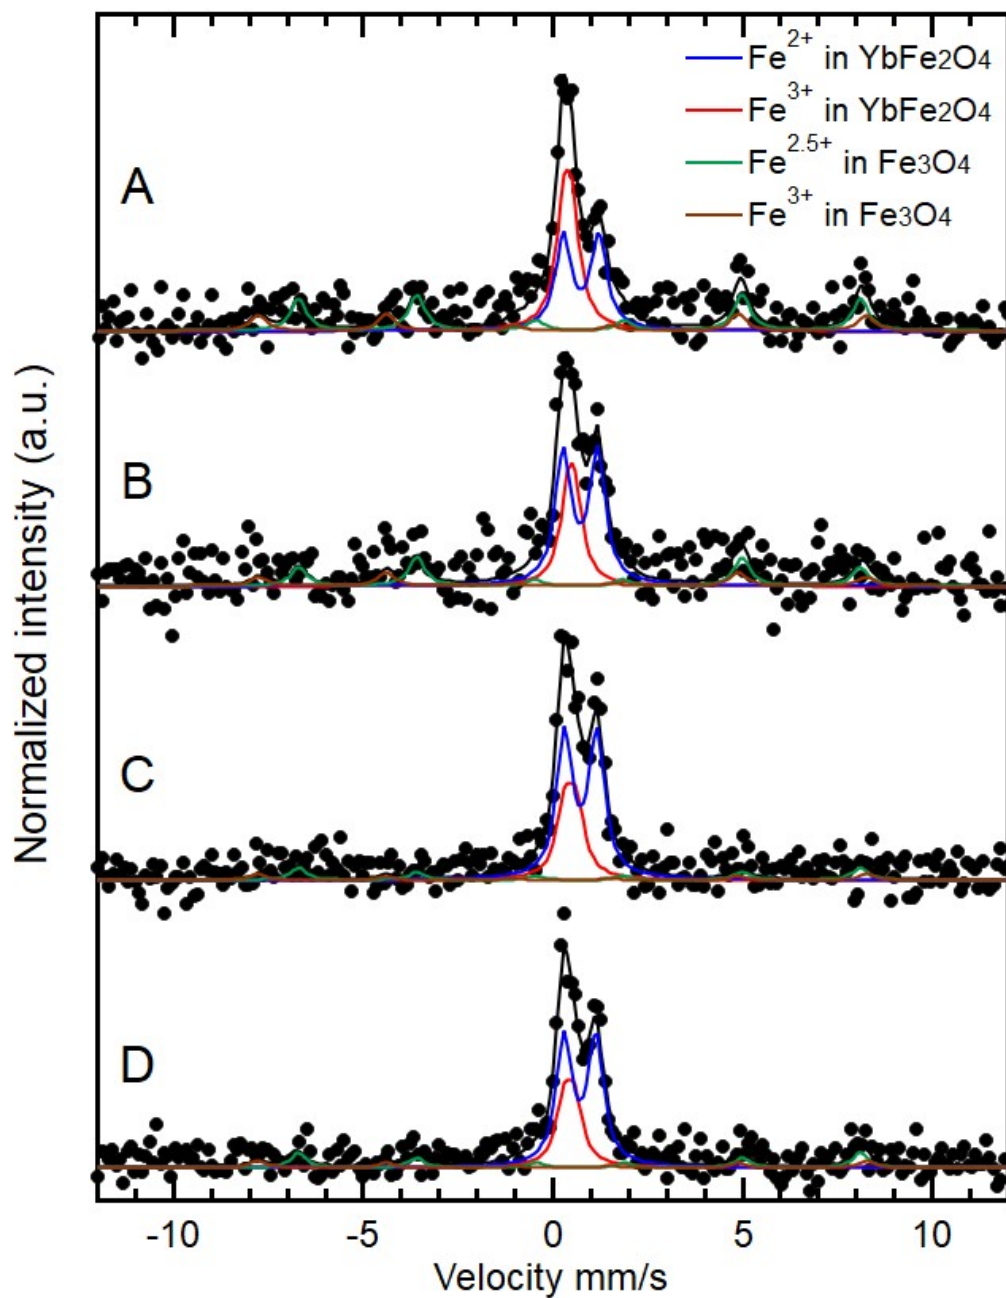

**Figure S1.** Wide velocity range Mössbauer spectra at RT of  $\text{YbFe}_2\text{O}_{4-\delta}$  films on YSZ (111) substrates at various  $P_{\text{O}_2}$  conditions. For the fitting procedure, Mössbauer hyperfine parameters of  $\text{Fe}_3\text{O}_4$  impurities were fixed to the literature values<sup>1</sup> of the stoichiometric  $\text{Fe}_3\text{O}_4$  film due to their small spectral intensity.

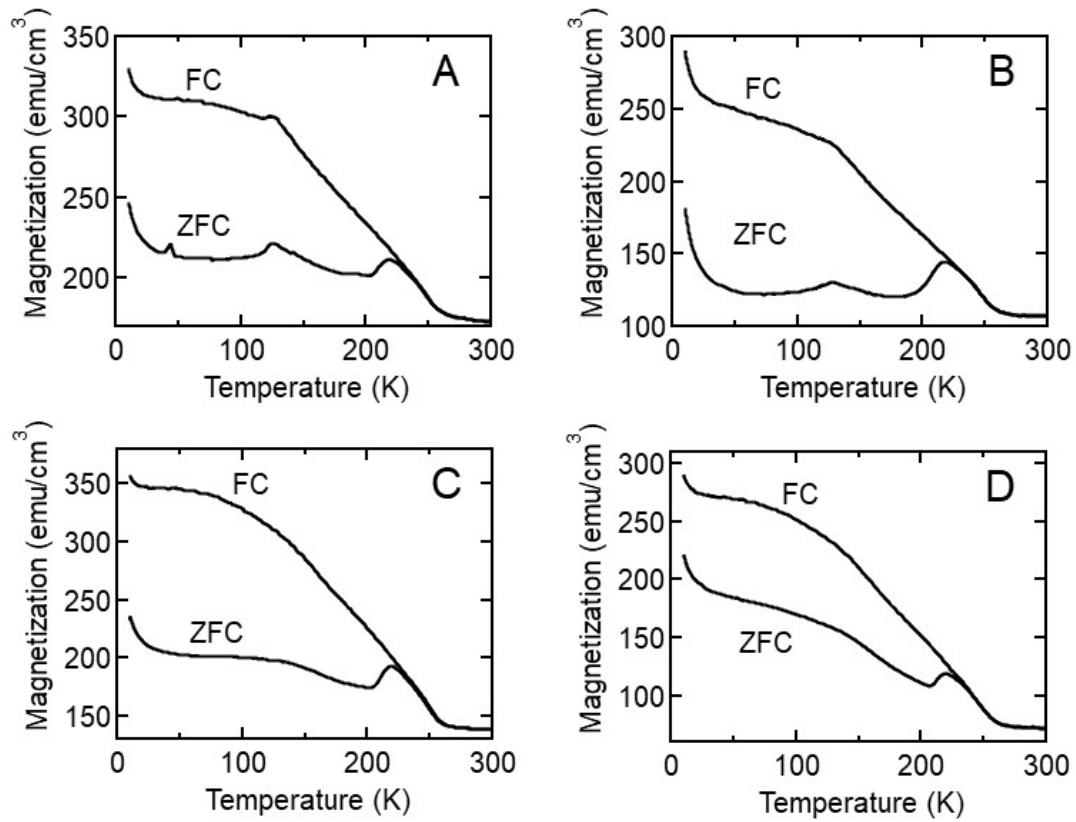

**Figure S2.** Field-cooled (FC) and zero-field-cooled (ZFC) magnetization curves of  $\text{YbFe}_2\text{O}_{4-\delta}$  films on YSZ (111) substrates at various  $P_{\text{O}_2}$  conditions. External magnetic field of 5 kOe was applied perpendicular to the film plane.

## Reference

1. T. Fujii, M. Takano, R. Katano, Y. Bando and Y. Isozumi, *J. Appl. Phys.*, 1990, **68**, 1735-1740.
